# Supplementary material
Source: PubMed Central journal article supplement (PMC7483201)
Supplement: NIHMS1566072-supplement-Supplemental_Material.pdf [file NIHMS1566072-supplement-Supplemental_Material.pdf]

## Supplementary Material

### Figure S1: Original Marijuana Purchase Task Instructional Vignette (Aston et al., 2015)

**Page 1:**

#### **Marijuana Purchase Task - Trait**

On the following page you will see a number of questions that ask how much marijuana you would consume at different levels of price. Please respond to these questions **as if you were actually in this situation.**

In addition, please answer the questions based on the following conditions:

- Imagine a TYPICAL DAY over the last month when you would use marijuana.
- Assume that you can only get marijuana from this source. That is, you can't go to a different source for cheaper marijuana and you cannot use any marijuana you may have saved or kept from previous episodes.
- Assume that you have the typical amount of money available to you or would need to get to purchase marijuana.
- Assume that you did NOT use marijuana or use any other drugs before you are making these decisions.
- Assume that you will NOT have an opportunity to use marijuana elsewhere after making these decisions.
- Assume that you would consume all the marijuana that you request. That is, you cannot stockpile the marijuana for a later date or bring it with you.
- Assume the marijuana you will use will be of AVERAGE quality and strength. Remember to think about how much marijuana you would smoke if it were of average quality.

**Remember, this is for a typical day over the last month, you can only get marijuana from this source, it is of average quality and strength, and you will use all of marijuana you request (you cannot stockpile extra marijuana).**

**Page 2: Given the previous conditions, how many hits of marijuana would you take ON A TYPICAL DAY at the following prices?**

For this task: there are 10 hits of marijuana in a joint. There is no limit on hits or joints.  
 1 joint = 1/32<sup>nd</sup> of an ounce (or half of 1/16<sup>th</sup> ounce) = 0.9 grams

|                                                                                 |  |
|---------------------------------------------------------------------------------|--|
| 1. How many hits of marijuana would you take if they were <b>FREE</b> ?         |  |
| 2. How many hits of marijuana would you take if they were <b>25¢ each</b> ?     |  |
| 3. How many hits of marijuana would you take if they were <b>50¢ each</b> ?     |  |
| 4. How many hits of marijuana would you take if they were <b>75¢ each</b> ?     |  |
| 5. How many hits of marijuana would you take if they were <b>\$1 each</b> ?     |  |
| 6. How many hits of marijuana would you take if they were <b>\$1.25 each</b> ?  |  |
| 7. How many hits of marijuana would you take if they were <b>\$1.50 each</b> ?  |  |
| 8. How many hits of marijuana would you take if they were <b>\$1.75 each</b> ?  |  |
| 9. How many hits of marijuana would you take if they were <b>\$2 each</b> ?     |  |
| 10. How many hits of marijuana would you take if they were <b>\$2.50 each</b> ? |  |
| 11. How many hits of marijuana would you take if they were <b>\$3 each</b> ?    |  |
| 12. How many hits of marijuana would you take if they were <b>\$3.50 each</b> ? |  |
| 13. How many hits of marijuana would you take if they were <b>\$4 each</b> ?    |  |
| 14. How many hits of marijuana would you take if they were <b>\$4.50 each</b> ? |  |
| 15. How many hits of marijuana would you take if they were <b>\$5 each</b> ?    |  |
| 16. How many hits of marijuana would you take if they were <b>\$5.50 each</b> ? |  |
| 17. How many hits of marijuana would you take if they were <b>\$6 each</b> ?    |  |
| 18. How many hits of marijuana would you take if they were <b>\$6.50 each</b> ? |  |
| 19. How many hits of marijuana would you take if they were <b>\$7 each</b> ?    |  |
| 20. How many hits of marijuana would you take if they were <b>\$8 each</b> ?    |  |
| 21. How many hits of marijuana would you take if they were <b>\$9 each</b> ?    |  |
| 22. How many hits of marijuana would you take if they were <b>\$10 each</b> ?   |  |

**Figure S2:** Updated Marijuana Purchase Task Instructional Vignette

**Page 1:**

**Marijuana Purchase Task – Trait Revised**

On the following page you will see a number of questions that ask how much marijuana you would use at different levels of price. Please respond to these questions as if you were actually in this situation.

Please answer the questions based on the following conditions:

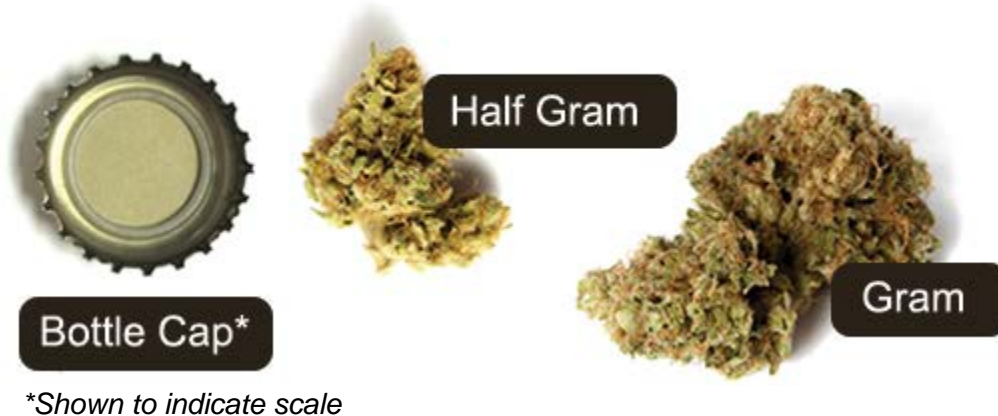

**At each price, choose how many GRAMS you would use. In case it is helpful, 1/8<sup>th</sup> of an ounce is 3.5 GRAMS.**

**At each price, choose the amount you would use over A TYPICAL WEEK (7 DAYS).**

**Assume that:**

- you can only get marijuana from this source. You can't go to a different source for cheaper marijuana and you cannot use any marijuana you may have saved.
- you have the typical amount of money available to you to purchase marijuana.
- you did NOT use marijuana or use any other drugs right before making these decisions.
- you will NOT have an opportunity to use marijuana elsewhere after making these decisions.
- you would use all the marijuana that you purchase. You can't save the marijuana for a later date.
- the marijuana you will purchase will be similar to the quality and strength of what you typically use.
- you can only buy a maximum of 99 grams.
- whether you are with people or alone, assume this amount of marijuana is only for your personal use.

Remember, this is for a typical **week**, you can only get marijuana from this source, it is similar to **your typical quality and strength**, and you will use all of marijuana you purchase (**you can't save extra** marijuana and this amount is **only for your personal use**).

Given the previous conditions, how many **GRAMS** of marijuana would you use during a **TYPICAL WEEK** at the following prices?

**Remember:**  
**1/8<sup>th</sup> ounce of marijuana = 3.5 GRAMS.**  
**The marijuana is of your typical quality and potency.**  
**The most you can purchase is 99 GRAMS.**

|     | PRICE per GRAM                                                               | Number of GRAMS: | Price per 1/8 <sup>th</sup> ounce at this rate: |
|-----|------------------------------------------------------------------------------|------------------|-------------------------------------------------|
| 1.  | How many <b>GRAMS</b> of marijuana would you use if they were FREE?          | _____            | 1/8 <sup>th</sup> oz.= \$0.00                   |
| 2.  | How many <b>GRAMS</b> of marijuana would you use if they were \$1 per gram?  | _____            | 1/8 <sup>th</sup> oz.= \$3.50                   |
| 3.  | How many <b>GRAMS</b> of marijuana would you use if they were \$2 per gram?  | _____            | 1/8 <sup>th</sup> oz.= \$7.00                   |
| 4.  | How many <b>GRAMS</b> of marijuana would you use if they were \$4 per gram?  | _____            | 1/8 <sup>th</sup> oz.= \$14.00                  |
| 5.  | How many <b>GRAMS</b> of marijuana would you use if they were \$6 per gram?  | _____            | 1/8 <sup>th</sup> oz.= \$21.00                  |
| 6.  | How many <b>GRAMS</b> of marijuana would you use if they were \$8 per gram?  | _____            | 1/8 <sup>th</sup> oz.= \$28.00                  |
| 7.  | How many <b>GRAMS</b> of marijuana would you use if they were \$10 per gram? | _____            | 1/8 <sup>th</sup> oz.= \$35.00                  |
| 8.  | How many <b>GRAMS</b> of marijuana would you use if they were \$12 per gram? | _____            | 1/8 <sup>th</sup> oz.= \$42.00                  |
| 9.  | How many <b>GRAMS</b> of marijuana would you use if they were \$14 per gram? | _____            | 1/8 <sup>th</sup> oz.= \$49.00                  |
| 10. | How many <b>GRAMS</b> of marijuana would you use if they were \$16 per gram? | _____            | 1/8 <sup>th</sup> oz.= \$56.00                  |
| 11. | How many <b>GRAMS</b> of marijuana would you use if they were \$18 per gram? | _____            | 1/8 <sup>th</sup> oz.= \$63.00                  |
| 12. | How many <b>GRAMS</b> of marijuana would you use if they were \$20 per gram? | _____            | 1/8 <sup>th</sup> oz.= \$70.00                  |
| 13. | How many <b>GRAMS</b> of marijuana would you use if they were \$25 per gram? | _____            | 1/8 <sup>th</sup> oz.= \$87.50                  |
| 14. | How many <b>GRAMS</b> of marijuana would you use if they were \$30 per gram? | _____            | 1/8 <sup>th</sup> oz.= \$105.00                 |
| 15. | How many <b>GRAMS</b> of marijuana would you use if they were \$35 per gram? | _____            | 1/8 <sup>th</sup> oz.= \$122.50                 |
| 16. | How many <b>GRAMS</b> of marijuana would you use if they were \$40 per gram? | _____            | 1/8 <sup>th</sup> oz.= \$140.00                 |
| 17. | How many <b>GRAMS</b> of marijuana would you use if they were \$45 per gram? | _____            | 1/8 <sup>th</sup> oz.= \$157.50                 |
| 18. | How many <b>GRAMS</b> of marijuana would you use if they were \$50 per gram? | _____            | 1/8 <sup>th</sup> oz.= \$175.00                 |
| 19. | How many <b>GRAMS</b> of marijuana would you use if they were \$55 per gram? | _____            | 1/8 <sup>th</sup> oz.= \$192.50                 |
| 20. | How many <b>GRAMS</b> of marijuana would you use if they were \$60 per gram? | _____            | 1/8 <sup>th</sup> oz.= \$210.00                 |
